# Supplementary material for: On the singularity of scandium
Source: Royal Society of Chemistry journal article supplement (doi:10.1039/d2nj00117a), 2022-01-01

Figure S1

(a) A partial view, down (001), of the structure of  $\text{Sc}(\text{O}_3\text{SCF}_3)_3 \cdot 8\text{H}_2\text{O}$  with the  $\text{CF}_3$  groups coloured black in order to highlight their association;

(b) A similar view of the structure of  $\text{Nd}(\text{O}_3\text{SCF}_3)_3 \cdot 9\text{H}_2\text{O}$

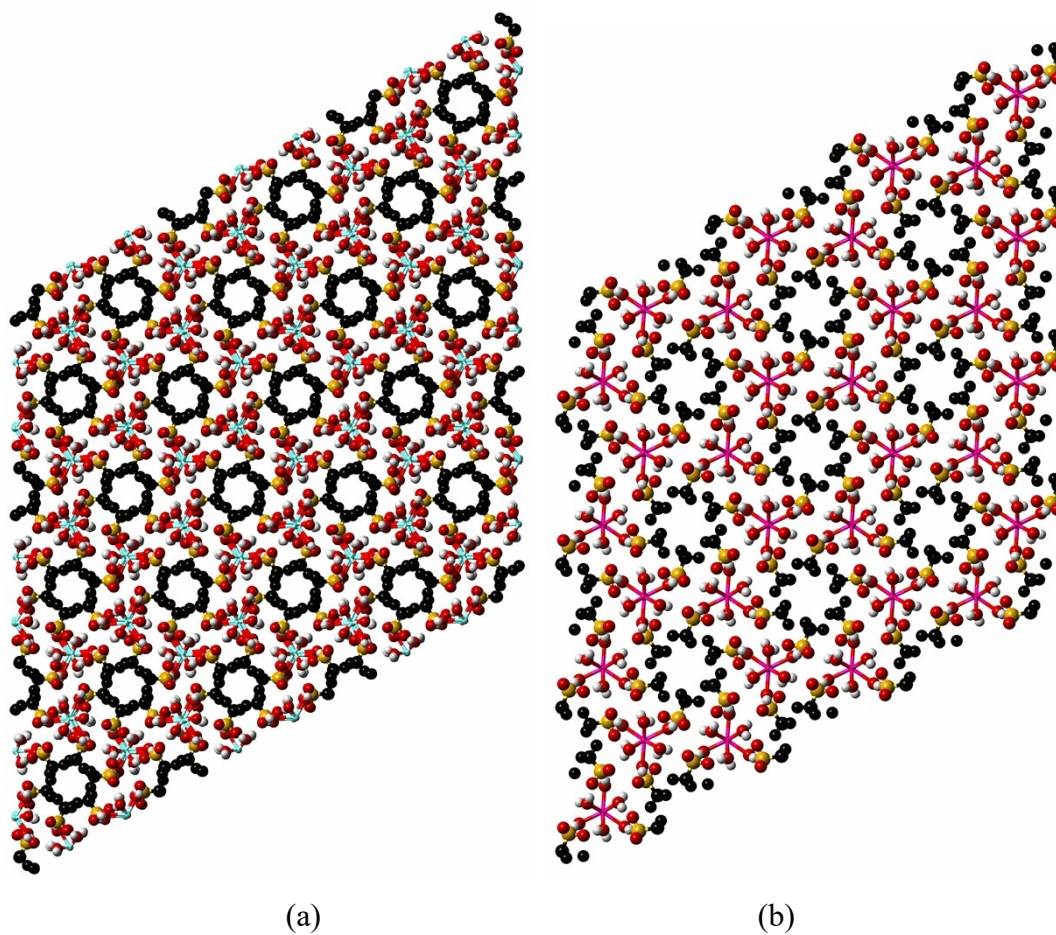

Supplement: d2nj00117a1.pdf [file d2nj00117a1.pdf]
